# Supplementary material for: Procurement of Deceased Donor Parathyroid Glands With the Aid of Near-infrared Autofluorescence Imaging
Source: PubMed Central journal article supplement (PMC8923582; doi:10.1097/txd.0000000000001306), 2022-03-10
Supplement: txd-8-e1306-s001.pdf [file txd-8-e1306-s001.pdf]

**Supplemental Digital Content 7. Categorical outcomes, Unplanned repeat surgeries for revision, Unplanned repeat surgeries for complications, Pain, Infections, and Reconstructive failure**

| Study, Year, PMID, Country            | Overall RoB | Outcome                               | Outcome Description   | Time Point | Group                 | Subgroup | n/N (%)         | Adjusted Odds Ratio (95% CI)       | P Value |
|---------------------------------------|-------------|---------------------------------------|-----------------------|------------|-----------------------|----------|-----------------|------------------------------------|---------|
| Fischer, 2014, 24916480, US           | High        | Unplanned repeat surgery for revision | Unplanned revision    | <6 mo      | IBR                   | All      | 8/155 (5.2)     | Ref                                | Ref     |
|                                       | High        | Unplanned repeat surgery for revision | Unplanned revision    | <6 mo      | AR                    | All      | 6/155 (3.9)     | NR                                 | 0.56    |
|                                       | High        | Unplanned repeat surgery for revision | Unplanned revision    | <1 y       | IBR                   | All      | 17/155 (11.0)   | Ref                                | Ref     |
|                                       | High        | Unplanned repeat surgery for revision | Unplanned revision    | <1 y       | AR                    | All      | 7/155 (4.5)     | NR                                 | 0.017   |
|                                       | High        | Unplanned repeat surgery for revision | Unplanned revision    | <2 y       | IBR                   | All      | 21/155 (13.5)   | Ref                                | Ref     |
|                                       | High        | Unplanned repeat surgery for revision | Unplanned revision    | <2 y       | AR                    | All      | 7/155 (4.5)     | NR                                 | 0.003   |
| Kulkarni, 2017, 28713853, US & Canada | Moderate    | Unplanned repeat surgery for revision | Unplanned revision    | 2 y        | IBR DTI               | All      | 31/93 (33.3)    | vs. IBR with TE: 0.58 (0.35, 0.96) | 0.035   |
|                                       | Moderate    | Unplanned repeat surgery for revision | Unplanned revision    | 2 y        | IBR TE                | All      | 503/1263 (39.8) | Ref                                | Ref     |
|                                       | Moderate    | Unplanned repeat surgery for revision | Unplanned revision    | 2 y        | AR with DIEP          | All      | 223/350 (63.7)  | vs. IBR with TE: 2.66 (1.83, 3.86) | <0.001  |
|                                       | Moderate    | Unplanned repeat surgery for revision | Unplanned revision    | 2 y        | AR with free TRAM     | All      | 56/87 (64.4)    | vs. IBR with TE: 2.26 (1.35, 3.78) | 0.002   |
|                                       | Moderate    | Unplanned repeat surgery for revision | Unplanned revision    | 2 y        | AR with pedicled TRAM | All      | 40/77 (57.1)    | vs. IBR with TE: 1.34 (0.75, 2.40) | 0.33    |
|                                       | Moderate    | Unplanned repeat surgery for revision | Unplanned revision    | 2 y        | AR with LD            | All      | 41/64 (64.1)    | vs. IBR with TE: 1.97 (1.07, 3.64) | 0.031   |
|                                       | Moderate    | Unplanned repeat surgery for revision | Unplanned revision    | 2 y        | AR with SIEA          | All      | 33/62 (53.2)    | vs. IBR with TE: 1.83 (0.93, 3.60) | 0.079   |
| Zhang, 2019, 30675702, China          | High        | Unplanned repeat surgery for revision | Unplanned reoperation | 4.9 y      | IBR                   | All      | 230/394 (58.4)  | Ref                                | Ref     |
|                                       | High        | Unplanned repeat surgery for revision | Unplanned reoperation | 4.9 y      | AR                    | All      | 154/438 (35.2)  | vs. IBR: 0.72 (0.50, 1.06)         | 0.093   |

| Study, Year, PMID, Country            | Overall RoB | Outcome                                    | Outcome Description                           | Time Point | Group                 | Subgroup | n/N (%)               | Adjusted Odds Ratio (95% CI) | P Value |
|---------------------------------------|-------------|--------------------------------------------|-----------------------------------------------|------------|-----------------------|----------|-----------------------|------------------------------|---------|
| Hangge, 2013, 31606126, US            | High        | Unplanned repeat surgery for complications | NR                                            | NR         | IBR DTI               | All      | 81/193 (42)           | vs. AR: 2.03 (1.03, 3.98)    | 0.042   |
|                                       | High        | Unplanned repeat surgery for complications | NR                                            | NR         | IBR TE                | All      | 58/146 (40)           | vs. AR: 1.81 (0.90, 3.64)    | 0.096   |
|                                       | High        | Unplanned repeat surgery for complications | NR                                            | NR         | AR                    | All      | 17/60 (28)            | Ref                          | Ref     |
| Mioton, 2013, 23562485, US            | Moderate    | Unplanned repeat surgery for complications | NR                                            | 1 mo       | IBR                   | All      | 662/9786 (6.76)       | 1.08 (0.88, 1.32)            | NR      |
|                                       | .           | Unplanned repeat surgery for complications | NR                                            | 1 mo       | AR                    | All      | 316/3296 (9.59)       | Ref                          | Ref     |
| Zhang, 2019, 30675702, China          | High        | Unplanned repeat surgery for complications | Urgent surgery for a compromised implant/flap | 4.9 y      | IBR                   | All      | 31/394 (7.9)          | vs. AR: 0.63 (0.29, 1.37)    | NR      |
|                                       | High        | Unplanned repeat surgery for complications | Urgent surgery for a compromised implant/flap | 4.9 y      | AR                    | All      | 33/438 (7.5)          | Ref                          | Ref     |
| de Araujo, 2016, 27673527, US         | High        | Infections                                 | SSI                                           | 4.3 y      | IBR                   | All      | NR/38 (NR)            | vs. AR 0.86 (0.18, 4.11)     | 0.847   |
|                                       | High        | Infections                                 | SSI                                           | 4.3 y      | AR                    | All      | NR/32 (NR)            | Ref                          | Ref     |
| Garvey, 2012, 23096600, US            | Moderate    | Infections                                 | Infections                                    | NR         | IBR                   | All      | 50/442 breasts (11.3) | Ref                          | Ref     |
|                                       | Moderate    | Infections                                 | Infections                                    | NR         | AR                    | All      | 21/548 breasts (3.8)  | vs. IBR: NR                  | <0.001  |
| Kulkarni, 2017, 28713853, US & Canada | Moderate    | Infections                                 | Breast WI                                     | 2 y        | IBR                   | All      | NR                    | NR                           | NR      |
|                                       | Moderate    | Infections                                 | Breast WI                                     | 2 y        | IBR DTI               | All      | 17/112 (15.2)         | vs IBR TE: 1.70 (0.91, 3.18) | 0.1     |
|                                       | Moderate    | Infections                                 | Breast WI                                     | 2 y        | IBR TE                | All      | 159/1525 (10.4)       | Ref                          | Ref     |
|                                       | Moderate    | Infections                                 | Breast WI                                     | 2 y        | AR (all)              | All      | NR                    | NR                           | NR      |
|                                       | Moderate    | Infections                                 | Breast WI                                     | 2 y        | AR with DIEP          | All      | 27/390 (6.9)          | vs IBR TE: 0.44 (0.25, 0.78) | 0.005   |
|                                       | Moderate    | Infections                                 | Breast WI                                     | 2 y        | AR with free TRAM     | All      | 5/95 (5.3)            | vs IBR TE: 0.45 (0.17, 1.18) | 0.10    |
|                                       | Moderate    | Infections                                 | Breast WI                                     | 2 y        | AR with pedicled TRAM | All      | 8/85 (9.4)            | vs IBR TE: 0.73 (0.31, 1.70) | 0.46    |
|                                       | Moderate    | Infections                                 | Breast WI                                     | 2 y        | AR with LD            | All      | 6/71 (8.5)            | vs IBR TE: 0.50 (0.15, 1.56) | 0.23    |

| Study, Year, PMID, Country  | Overall RoB | Outcome                | Outcome Description                                                                      | Time Point | Group        | Subgroup | n/N (%)              | Adjusted Odds Ratio (95% CI)                                 | P Value       |
|-----------------------------|-------------|------------------------|------------------------------------------------------------------------------------------|------------|--------------|----------|----------------------|--------------------------------------------------------------|---------------|
|                             | Moderate    | Infections             | Breast WI                                                                                | 2 y        | AR with SIEA | All      | 8/65 (12.3)          | vs IBR TE: 0.67 (0.25, 1.82)                                 | 0.43          |
| Mioton, 2013, 23562485, US  | Moderate    | Infections             | WI                                                                                       | 1 mo       | IBR          | All      | 338/9786 (3.45)      | Ref                                                          | Ref           |
|                             | Moderate    | Infections             | WI                                                                                       | 1 mo       | AR           | All      | 180/3296 (5.46)      | vs IBR: 1.40 (1.01, 1.96)                                    | NR            |
|                             | Moderate    | Infections             | Superficial SSI                                                                          | 1 mo       | IBR          | All      | 163/9786 (1.67)      | Ref                                                          | Ref           |
|                             | Moderate    | Infections             | Superficial SSI                                                                          | 1 mo       | AR           | All      | 97/3296 (2.95)       | vs IBR: 1.20 (0.81, 1.76)                                    | NR            |
|                             | Moderate    | Infections             | Deep SSI                                                                                 | 1 mo       | IBR          | All      | 195/9786 (1.07)      | Ref                                                          | Ref           |
|                             | Moderate    | Infections             | Deep SSI                                                                                 | 1 mo       | AR           | All      | 65/3296 (1.97)       | vs IBR: 1.81 (1.12, 2.94)                                    | NR            |
| Naoum, 2020a, 31756414, US  | High        | Infections             | NR                                                                                       | 4-10 y     | IBR          | All      | 23/633 breasts (3.6) | Ref                                                          | Ref           |
|                             | High        | Infections             | NR                                                                                       | 4-10 y     | AR           | All      | 9/342 breasts (2.6)  | vs IBR: 0.77 (0.20, 2.50)                                    | 0.67          |
| Naoum, 2020b, 32607638, US  | High        | Infections             | NR                                                                                       | 4.3-6.3 y  | IBR DTI      | All      | 7/127 (5.5)          | Ref                                                          | Ref           |
|                             | High        | Infections             | NR                                                                                       | 4.3-6.3 y  | IBR with TE  | All      | 2/88 (2.2)           | Ref                                                          | Ref           |
|                             | High        | Infections             | NR                                                                                       | 4.3-6.3 y  | AR           | All      | 11/85 (13.0)         | vs. IBR DTI: 3.2 (0.6, 16)<br>vs. IBR with TE: 8.1 (1.7, 39) | 0.20<br>0.009 |
| Chetta, 2017, 28002254, US  | High        | Reconstructive failure | NR                                                                                       | 1.3 mo     | IBR          | All      | 1101/3746 (29.4)     | Ref                                                          | Ref           |
|                             | High        | Reconstructive failure | NR                                                                                       | 1.3 mo     | AR           | All      | 40/935 (4.3)         | vs IBR: 0.09 (0.07, 0.13)                                    | <0.001        |
| Fischer, 2013, 23629074, US | High        | Reconstructive failure | Flap loss in AR or unplanned, nonaesthetic TE/I removal related to a complication in IBR | NR         | IBR          | All      | 4/60 (7.3)           | Ref                                                          | Ref           |
|                             | High        | Reconstructive failure | Flap loss in AR or unplanned, nonaesthetic TE/I removal related to a complication in IBR | NR         | AR           | All      | 2/142 (1.3)          | vs IBR: 0.19 (0.04, 0.80)                                    | 0.03          |

| Study, Year, PMID, Country            | Overall RoB | Outcome                | Outcome Description     | Time Point | Group     | Subgroup   | n/N (%)               | Adjusted Odds Ratio (95% CI)     | P Value |
|---------------------------------------|-------------|------------------------|-------------------------|------------|-----------|------------|-----------------------|----------------------------------|---------|
| Garvey, 2012, 23096600, US            | Moderate    | Reconstructive failure | NR                      | NR         | IBR       | All        | 70/442 breasts (15.8) | Ref                              | Ref     |
|                                       | Moderate    | Reconstructive failure | NR                      | NR         | AR        | All        | 8/548 breasts (1.5)   | vs IBR: NR                       | <0.001  |
| Kulkarni, 2017, 28713853, US & Canada | Moderate    | Reconstructive failure | NR                      | 2 y        | IBR (all) | All        | NR                    | Ref                              | Ref     |
|                                       | Moderate    | Reconstructive failure | NR                      | 2 y        | IBR (all) | Unilateral | 41/600 (6.83)         | NR                               | NR      |
|                                       | Moderate    | Reconstructive failure | NR                      | 2 y        | IBR (all) | Bilateral  | 74/994 (7.44)         | NR                               | NR      |
|                                       | Moderate    | Reconstructive failure | NR                      | 2 y        | AR (all)  | All        | NR                    | NR                               | NR      |
|                                       | Moderate    | Reconstructive failure | NR                      | 2 y        | AR (all)  | Unilateral | 4/317 (1.26)          | vs. IBR (all): 0.12 (0.04, 0.36) | <0.001  |
|                                       | Moderate    | Reconstructive failure | NR                      | 2 y        | AR (all)  | Bilateral  | 4/224 (1.87)          | vs. IBR (all): 0.14 (0.05, 0.45) | 0.001   |
| Mioton, 2013, 23562485, US            | Moderate    | Reconstructive failure | Implant or flap failure | 1 mo       | IBR       | All        | 83/9786 (0.85)        | Ref                              | Ref     |
|                                       | Moderate    | Reconstructive failure | Implant or flap failure | 1 mo       | AR        | All        | 10/3296 (3.13)        | vs. IBR: 1.69 (1.08, 2.62)       | NR      |

Abbreviations: AR = autologous reconstruction, CI = confidence interval, DVT = deep vein thrombosis, ED = emergency department, IBR = implant-based reconstruction, N/A = not applicable, NR = not reported, NRCS = nonrandomized comparative study, PE = pulmonary embolism, PMID = PubMed identifier, RoB = risk of bias, SSI = surgical site infection, y = years.
